# Supplementary material
Source: publisher figshare collection journal article supplement (https://gsajournals.figshare.com/ndownloader/files/25457408)
Supplement: Supplementary file 1 [file 25457408]

## Sheet: Phenotypic_data
Individuals_in_Map_Order	Fno_Season_1	Fno_Season_2	Fno_Season_3	Fno_Season_4	Fwt_Season_1	Fwt_Season_2	Fwt_Season_3	Fwt_Season_4	DryMatter_Season_1	DryMatter_Season_2	DryMatter_Season_3	DryMatter_Season_4	Str_Season_4	KingFlr_Season_4
BBC3455	n	n	n	n	n	n	n	n	n	n	n	n	n	n
BBC3457	n	n	n	n	n	n	n	n	n	n	n	n	n	n
BBC3459	0	0	0	n	n	n	n	n	n	n	n	n	n	n
BBC3461	n	n	n	n	n	n	n	n	n	n	n	n	n	n
BBC3463	n	n	n	n	n	n	n	n	n	n	n	n	n	n
BBC3465	2	24	0	112	49.6	61.25	n	65.8766	17.7122	20.5657	n	n	1.074	2.06667
BBC3467	61	31	0	45	72.216	95.87	n	98.5467	19.2691	20.7031	n	n	0.708	1.44444
BBC3469	n	n	n	n	n	n	n	n	n	n	n	n	n	n
BBC3471	n	n	n	n	n	n	n	n	n	n	n	n	n	n
BBC3473	4	0	0	24	63.15	n	n	86.5214	19.1693	n	n	n	0.33875	2.15385
BBC3475	n	n	n	n	n	n	n	n	n	n	n	n	n	n
BBC3477	n	n	n	n	n	n	n	n	n	n	n	n	n	n
BBC3479	n	n	n	n	n	n	n	n	n	n	n	n	n	n
BBC3483	n	n	n	n	n	n	n	n	n	n	n	n	n	n
BBC3485	0	0	0	107	n	n	n	55.8607	n	n	n	n	0.842	3.55128
BBC3487	0	26	0	49	n	60.9524	n	63.1209	n	18.0411	n	n	0.506	2.5625
BBC3489	n	n	n	n	n	n	n	n	n	n	n	n	n	n
BBC3491	2	23	0	75	63.55	78.9474	n	82.4874	17.7802	18.5707	n	n	0.416	2.80952
BBC3493	3	0	0	57	39.45	n	n	71.3502	20.0837	n	n	n	0.5775	3.34568
BBC3495	0	0	0	n	n	n	n	n	n	n	n	n	n	n
BBC3497	0	0	0	46.3333	n	n	n	67.1361	n	n	n	n	1.08808	2.04872
BBC3499	0	61	0	14	n	66.6667	n	90.8556	n	21.5438	n	n	0.966	1.94118
BBC3501	2	31	0	67	63.8	73.1707	n	82.6729	15.8859	16.717	n	14.6375	0.734333	3.76775
BBC3503	0	0	0	8.66667	n	n	n	83.6667	n	n	n	n	0.365333	1.06873
BBC3505	5	83	0	19	63.35	55.8217	n	70.8006	19.2893	19.2249	n	14.916	0.797	3.23077
BBC3507	2	0	0	39	n	n	n	71.4497	n	n	n	16.8797	0.641	3.19231
BBC3509	7	9	0	40.6667	70	82.94	n	87.9215	18.4615	n	n	n	0.800333	2.24929
BBC3511	5	61	0	76	56.04	69.1525	n	53.6981	17.2231	19.6408	n	n	0.798	2.88462
BBC3513	0	31	0	64.3333	n	83.335	n	81.1694	n	18.855	n	n	0.733667	3.87959
BBC3515	n	n	n	n	n	n	n	n	n	n	n	n	n	n
BBC3517	3	0	0	22	53.1333	n	n	51.0222	19.3786	n	n	17.5434	0.46	0.722611
BBC3519	2	61	0	53.6667	35.3	58.3099	n	58.8375	18.231	21.7878	n	16.7916	0.972667	4.50649
BBC3521	5	24	0	68	62.04	81.4316	n	98.2486	16.8837	16.7643	n	n	0.825	2.40741
BBC3523	3	0	0	27	32.8	n	n	66.3096	n	n	n	n	0.725	0.965517
BBC3525	2	12	0	24	43.25	79.26	n	68.619	18.7291	22.3476	n	n	0.49	1.52381
BBC3527	0	0	0	7	n	n	n	85.3875	n	n	n	n	0.5025	0.725275
BBC3529	19	101	0	94	81.12	94.8931	n	81.6611	19.9582	18.5097	n	n	0.693	4.03704
BBC3531	1	0	0	41	n	n	n	61.4803	n	n	n	17.8637	0.457	1.13636
BBC3533	1	12	0	74	39.7	68	n	59.8702	17.0157	20.5374	n	17.5705	1.16167	2.16667
BBC3535	28	61	0	27	84.5389	86.9283	n	99.4729	18.6667	20.13	n	n	0.698	1.6087
BBC3537	2	24	0	18	45.9	78.9474	n	109.868	13.4615	18.0661	n	n	0.4725	1.86207
BBC3539	2	14	0	61	60.3	86.6667	n	70.814	19.9546	24.5161	n	18.648	0.605	2.15
BBC3541	2	12	0	57.6667	n	98.25	n	97.0973	n	n	n	n	0.399	2.43485
BBC3543	5	31	0	71	48.5	68.8889	n	64.1776	14.4834	21.1831	n	n	0.552	1.69231
BBC3545	3	31	0	61	51	58.75	n	59.0435	19.9678	23.6516	n	19.1667	0.617	2.08824
BBC3547	3	26	0	31	74.7	86.735	n	103.671	19.8138	20.9677	n	n	0.829	1.91667
BBC3549	1	31	0	44	52	86.9333	n	78.8897	19.1304	21.3362	n	n	0.966	3.24
BBC3551	0	31	0	0	n	71.6981	n	n	n	21.7468	n	n	n	0
BBC3553	0	0	0	24	n	n	n	61.2706	n	n	n	n	0.852	1.33333
BBC3555	2	31	0	23	52.55	72	n	77.3063	15.2648	20.5462	n	n	0.504	1.82759
BBC3557	0	0	0	19	n	n	n	50.2117	n	n	n	n	0.527	3.62963
BBC3559	5	8	0	44	68.55	70	n	94.2017	16.6478	20.4509	n	n	0.353	2.83333
BBC3561	1	21	0	58.3333	35.9	84.4444	n	67.9196	16.9231	22.2641	n	18.5083	0.48	3.28725
BBC3563	5	13	0	51	81.3	95.32	n	90.1195	19.1097	20.7317	n	16.6987	0.829667	2.17213
BBC3565	1	21	0	37	63.8	65.2632	n	71.3903	19.4384	21.7784	n	n	1.3	1.28571
BBC3567	0	0	0	35	n	n	n	45.9219	n	n	n	n	0.757	2.92857
BBC3569	0	25	0	6	n	58.8235	n	60.575	n	21.5883	n	n	0.6725	0.318182
BBC3571	5	31	0	54	54.08	62.8571	n	68.3543	16.4451	17.7968	n	n	1.004	1.55882
BBC3573	2	21	0	14.6667	36.2	78.8385	n	88.4891	14.5946	14.7059	n	n	0.5065	1.96429
BBC3575	4	70	0	69	69.2	88.8889	n	83.5931	16.4045	21.0667	n	n	0.4275	3.70807
BBC3577	2	31	0	28	n	89.624	n	95.242	n	18.3352	n	n	0.879	1.76
BBC3579	5	31	0	130	43.625	70.0724	n	57.9034	19.2681	22.105	n	n	0.922	2.51724
BBC3581	1	61	0	53.6667	58	71.6049	n	63.8357	17.3375	18.9765	n	13.1579	0.887	3.74212
BBC3583	0	10	0	34	n	74.7875	n	69.4061	n	n	n	20.1207	2.103	1.28571
BBC3585	3	40	0	39	54.1333	77.355	n	66.3129	17.8468	20.6262	n	n	1.202	2.30769
BBC3587	0	0	0	20.3333	n	n	n	59.1704	n	n	n	16.8646	0.5925	1.8838
BBC3589	2	0	0	38.3333	36.5667	n	n	65.5549	15.8927	n	n	15.4362	0.7295	1.19671
BBC3591	1	26	0	97	28	60	n	84.0793	17.5824	20.4731	n	n	0.49	3.0625
BBC3593	5	13	0	13	71.425	68.5889	n	89.1583	17.823	19.2067	n	n	0.56	1.35294
BBC3595	1	10	0	12	51.7	53.3625	n	67.9625	20.6799	21.3198	n	n	0.371667	2.36842
BBC3597	4	31	0	76	64.125	80.0917	n	114.201	17.2157	19.5756	n	n	0.577	3.2
BBC3599	3	0	0	88	39.9	n	n	53.1247	18.5075	n	n	n	0.595	2.77778
BBC3601	4	14	0	45	45.5667	91.22	n	87.6862	17.1604	20.7143	n	n	0.412	1.44
BBC3603	4	7	0	10	36.3	77.6571	n	53.24	17.6399	20.2559	n	n	0.643333	2.47059
BBC3605	0	0	0	3	n	n	n	n	n	n	n	n	n	3.11765
BBC3607	4	0	0	21	44.4667	n	n	53.9621	18.4748	n	n	n	0.39	4.68421
BBC3609	4	15	0	29.3333	43.85	57.4	n	64.4184	16.1364	19.4154	n	16.3415	0.442333	0.821698
BBC3611	3	31	0	46	54.7667	68.4211	n	87.7791	19.4354	20.8488	n	n	0.898	2.73077
BBC3613	2	13	0	43	25.75	47.26	n	47.229	23.8095	21.6625	n	17.7467	0.852	3.94444
BBC3615	2	31	0	62	36.4	54.1667	n	68.7151	19.2254	22.306	n	n	0.573	3.75
BBC3617	4	38	0	37	81.25	75.4711	n	76.5283	19.4476	18.3044	n	n	0.619333	2.83957
BBC3619	0	15	0	126	n	80	n	65.5952	n	20.3971	n	n	0.967	1.88235
BBC3621	5	31	0	n	50.24	63.3333	n	n	18.1383	17.9882	n	n	n	n
BBC3623	0	0	0	n	n	n	n	n	n	n	n	n	n	n
BBC3625	4	61	0	n	50.05	82.6898	n	n	18.4109	20.5613	n	n	n	n
BBC3627	0	31	0	13	n	79.08	n	111.112	n	20.239	n	n	0.70625	1.2963
BBC3629	3	0	0	18.6667	33	n	n	48.9443	16.913	n	n	n	0.759333	1.75417
BBC3631	0	6	0	88	n	42.7667	n	73.4489	n	n	n	18.74	0.836333	2.67575
BBC3633	1	18	0	n	59.5	65.4467	n	n	20.7792	20.298	n	n	n	n
BBC3635	0	0	0	8	n	n	n	44.74	n	n	n	n	0.7	1.65217
BBC3637	3	31	0	4	66.7667	69.7872	n	n	20.3922	21.5852	n	n	n	3.73684
BBC3641	17	82	0	n	76.8333	84.642	n	n	18.2216	17.6249	n	n	n	n
BBC3643	2	31	0	128	66.15	94.3296	n	93.5942	16.8085	18.7122	n	n	0.57	2.75
BBC3645	1	0	0	7	46.2	n	n	105.767	16.1148	n	n	14.9351	0.893333	2.92857
BBC3647	3	31	0	n	37.3333	59.1452	n	n	17.5172	23.1687	n	n	n	n
BBC3649	2	31	0	n	43.6	72.3077	n	n	17.2775	20.7415	n	n	n	n
BBC3651	0	0	0	14	n	n	n	66.7545	n	n	n	n	0.362	1.97368
BBC3653	4	21	0	n	80.05	111.5	n	n	16.4107	20.1365	n	n	n	n
BBC3657	5	0	0	n	42.88	n	n	n	16.0851	n	n	n	n	n
BBC3659	4	0	0	90	52.2	n	n	59.9723	14.7887	n	n	n	0.631	2.96296
BBC3661	n	n	n	n	n	n	n	n	n	n	n	n	n	n
BBC3663	0	7	0	n	n	46.3	n	n	n	19.7468	n	n	n	n
BBC3665	2	0	0	n	50.1	n	n	n	14.0082	n	n	n	n	n
BBC3667	0	0	0	5.66667	n	n	n	88.6419	n	n	n	n	0.797	2.949
BBC3669	0	50	0	11	n	87.336	n	96.595	n	19.2023	n	n	1.041	4.54167
BBC3671	12	31	0	50	70.4889	90.62	n	71.5235	17.5	17.2099	n	16.1504	0.896	4.04348
BBC3673	1	31	0	15	67	55.814	n	49.675	17.6471	21.3936	n	n	0.71	2
BBC3675	0	31	0	n	n	57.1429	n	n	n	20.4677	n	n	n	n
BBC3677	n	n	n	n	n	n	n	n	n	n	n	n	n	n
BBC3679	2	0	0	n	32.75	n	n	n	20.8937	n	n	n	n	n
BBC3681	0	13	0	n	n	73.85	n	n	n	18.559	n	n	n	n
BBC3683	2	31	0	33	50.55	82.9419	n	91.6382	18.4713	19.7563	n	n	1.512	3
BBC3685	1	0	0	n	15.9	n	n	n	14.5833	n	n	n	n	n
BBC3687	0	101	0	33	n	63.0952	n	64.4316	n	21.3801	n	n	0.939	1.82609
BBC3691	3	21	0	n	47.5333	63.7765	n	n	20.8214	22.593	n	n	n	n
BBC3693	2	0	0	n	29	n	n	n	21.5643	n	n	n	n	n
BBC3695	0	0	0	14.3333	n	n	n	54.0428	n	n	n	n	0.485389	1.27312
BBC3697	31	48	0	120	71.5769	89.0125	n	87.4101	18.8592	22.4125	n	n	0.806	2.22581
BBC3699	0	61	0	22	n	75.5814	n	93.1814	n	19.5389	n	n	0.227	2
BBC3701	5	0	0	n	54.2	n	n	n	18.4869	n	n	n	n	n
BBC3703	0	31	0	n	n	71.7647	n	n	n	20.3394	n	n	n	n
BBC3705	2	13	0	n	39.5	64.2167	n	n	16.4508	20.1456	n	n	n	n
BBC3707	1	0	0	n	39.9	n	n	n	20.098	n	n	n	n	n
BBC3709	0	6	0	59.3333	n	n	n	53.7295	n	n	n	n	0.5965	2.1039
BBC3711	0	13	0	n	n	72.7273	n	n	n	23.5149	n	n	n	n
BBC3713	n	n	n	6.33333	n	n	n	86.8833	n	n	n	n	0.547	0.209877
BBC3715	0	13	0	38.6667	n	74.0667	n	84.9564	n	n	n	n	0.629	0.777778
BBC3717	0	3	0	4	n	n	n	n	n	n	n	n	n	0.323671
BBC3719	0	29	0	7	n	99.675	n	69.8754	n	19.8036	n	n	0.815	0.977778
BBC3721	n	n	n	n	n	n	n	n	n	n	n	n	n	n
BBC3723	0	3	0	6.33333	n	n	n	88.7719	n	n	n	17.5385	0.871	0.0175439
BBC3725	n	n	n	n	n	n	n	n	n	n	n	n	n	n
BBC3727	n	n	n	n	n	n	n	n	n	n	n	n	n	n
BBC3729	0	6	15	107.333	n	71.6667	99.3429	104.615	n	21.5722	16.9421	16.0745	1.0375	2.1313
BBC3731	0	31	52	17.3333	n	72.2222	75.0432	65.2796	n	22.655	17.6587	n	0.93	1.18968
BBC3733	2	37	201	21.6667	54.07	94.4568	102.215	86.717	15.4315	16.7525	17.8428	n	0.922333	1.4286
BBC3735	1	31	140	10.3333	75.51	63.0769	69.8344	65.4367	20.4503	19.7228	19.2425	n	0.603833	1.06061
BBC3737	3	21	5	5.33333	46.515	61.3333	59.7	64.5383	21.6645	22.5888	19.122	n	1.32383	0.39922
BBC3739	0	0	3	3	n	n	63	80.2222	n	n	17.085	n	0.372	0.611111
BBC3741	5	61	86	29.6667	65.734	61.7544	71.0818	67.352	16.8524	17.4733	19.7507	n	0.579	1.01006
BBC3743	0	0	130	24.3333	n	n	81.5133	77.9423	n	n	16.9749	n	1.04267	0.659926
BBC3745	n	n	n	n	n	n	n	n	n	n	n	n	n	n
BBC3747	0	0	23	9.33333	n	n	86.1263	75.7808	n	n	19.5394	n	0.432	0.287037
BBC3749	4	27	53	12	48.254	60	75.3567	65.7837	16.1867	18.0066	13.7989	n	0.72	1.89091
BBC3751	2	18	76	12	62.94	58.5714	67.9164	69.5794	20.9346	23.3618	21.997	21.312	1.58283	0.94697
BBC3753	4	31	20	33.3333	70.734	64.7619	68.8571	72.5787	20.5523	18.5864	19.1617	n	0.841	1.85037
BBC3755	0	0	41	45.3333	n	n	64.45	61.6028	n	n	19.945	18.251	0.5765	2.1003
BBC3757	2	0	79	12.3333	36.8	n	57.2	50.3566	21.3836	n	19.7845	n	0.6055	2.2724
BBC3759	0	0	0	29.3333	n	n	n	80.6275	n	n	n	n	0.545	1.63006
BBC3761	0	9	18	11.6667	n	45	67.98	48.6002	n	21.9931	24.3243	17.4129	1.037	1.3324
BBC3763	n	n	n	n	n	n	n	n	n	n	n	n	n	n
BBC3765	5	61	47	40	63.164	71.6923	84.2703	84.771	19.0366	21.2074	19.3873	n	0.666333	1.30411
BBC3767	0	25	68	27.6667	n	67.3684	89.5333	86.7056	n	20.2186	17.6135	18.2627	1.215	1.4523
BBC3769	4	0	17	10.6667	51.065	n	80.6	90.2378	18.9203	n	17.8571	n	0.718167	0.613841
BBC3771	4	22	65	9	68.7	78.05	79.5095	86.7745	18.1125	21.3636	18.6001	n	1.332	0.140741
BBC3773	1	21	77	11	42.24	65.8571	62.0393	61.1578	17.9551	20.8897	19.8387	n	1.64133	0.634769
BBC3775	0	0	54	3.66667	n	n	71.4837	56.185	n	n	18.1838	n	0.528333	0.546847
BBC3777	0	0	17	13.3333	n	n	68.0778	67.6592	n	n	21.1726	19.7853	0.98	1.00323
BBC3779	3	28	133	17	48.43	71.2231	65.9655	77.4491	19.9732	19.7998	16.5248	19.5339	1.0595	1.22398
BBC3781	0	0	250	7.33333	n	n	83.9789	69.7975	n	n	17.1596	n	0.428333	0.265152
BBC3783	3	31	53	2.33333	77.5067	87.7452	115.426	n	18.6075	18.8243	19.704	n	n	0.6625
BBC3785	1	31	50	26.3333	51.41	69.4595	101.539	66.5622	17.6806	16.9052	19.034	n	1.43967	1.68469
BBC3787	0	0	34	25	n	n	85.0346	77.4356	n	n	17.023	n	0.4595	1.84375
BBC3789	1	31	46	26	55.66	56.5517	78.0312	57.8878	17.1386	17.9142	15.6498	n	0.746667	1.50726
BBC3791	10	44	67	7	73.875	90.7386	103.623	82.6871	17.2973	17.7938	15.7283	n	0.564	0.523488
BBC3793	4	0	64	9.33333	39.7933	n	72.6718	63.6905	19.2369	n	17.2801	n	1.11475	0.848214
BBC3795	28	31	89	49	74.2182	61.5827	70.4184	67.7558	22.7446	22.1483	21.0288	20.0445	0.822333	0.733333
BBC3797	0	14	34	9.66667	n	73.2875	101.626	92.9928	n	19.2405	17.6922	n	1.6045	2.24589
BBC3799	1	0	61	26	41.94	n	59.5068	54.8378	15.978	n	14.669	17.3989	0.701	0.682375
BBC3801	2	31	91	10.3333	62.815	69.3333	95.9827	86.21	18.7929	19.3632	17.4005	14.7826	0.657	1.50245
BBC3803	5	61	81	79	37.116	56.0377	71.0882	59.174	20.2532	22.2156	19.7711	22.2222	1.17067	1.8229
BBC3805	5	31	86	53.3333	34.52	49.1525	68.6174	59.5066	16.8122	20.6269	18.7788	n	1.35367	1.96795
BBC3807	2	0	241	37.3333	51.72	n	63.3249	51.6315	19.8391	n	17.8267	n	0.577	0.718832
BBC3809	0	24	222	26.6667	n	56.9231	79.41	53.5865	n	17.1429	17.7363	n	0.986667	0.934898
BBC3811	2	61	86	19	32.035	48.0412	69.5085	53.5347	17.0648	19.8301	16.9093	16.5067	0.823667	1.57576
BBC3813	0	0	54	88	n	n	91.3689	82.3385	n	n	19.6805	n	1.117	1.55134
BBC3815	2	101	72	72	58.49	50.08	64.6935	69.0891	16.0187	17.6312	23.3133	n	0.6735	3.23596
BBC3817	0	0	38	32	n	n	50.3048	59.2296	n	n	19.7283	n	0.721	3.48336
BBC3819	0	0	25	2.66667	n	n	53.9889	n	n	n	17.1708	n	n	0.104103
BBC3821	n	n	n	n	n	n	n	n	n	n	n	n	n	n
BBC3823	2	26	46	7.66667	50.375	72.1409	75.8364	78.0827	20.1847	18.5839	20.6357	n	1.30088	0.242117
BBC3825	0	0	43	24	n	n	48.9314	53.5156	n	n	22.2492	n	0.652	1.69444
BBC3827	0	23	34	0.666667	n	93.4467	83.9667	n	n	20.524	19.319	n	n	0.0435606
BBC3829	0	31	21	34	n	48.4211	44.5438	53.4867	n	20.1844	19.3717	18.4211	0.8065	0.561077
BBC3831	0	0	58	46	n	n	70.9921	80.8098	n	n	14.7911	n	0.5885	2.68948
BBC3833	6	28	19	10.6667	84.0333	79.688	92.9625	102.108	15.7428	18.3859	15.8621	16.7795	0.699833	0.850922
BBC3835	2	21	62	17.6667	56.205	62.2923	76.6176	81.3798	17.193	16.4589	16.6084	n	0.499333	1.58095
BBC3837	0	0	3	16.6667	n	n	n	40.7716	n	n	16.5425	n	0.9045	1.63824
BBC3839	2	31	0	n	52.975	64.316	n	n	17.6703	16.9994	n	n	n	n
BBC3841	3	31	54	9	61.565	75.5556	78.1023	87.3919	20.0986	22.2948	21.4873	19.7778	0.5445	0.47347
BBC3843	1	0	6	22.3333	39.93	n	42.98	48.1199	18.75	n	22.119	n	0.895	2.85
BBC3845	2	0	91	31.3333	47.045	n	86.6068	81.9874	17.7632	n	18.9261	17.5966	0.945625	1.24904
BBC3847	n	n	n	n	n	n	n	n	n	n	n	n	n	n
BBC3849	0	0	184	25.3333	n	n	73.7949	66.9977	n	n	17.5231	18.4104	0.455	1.00517
BBC3851	1	16	72	7	n	103.286	99.7717	89.2196	n	18.5882	17.0918	n	0.6875	1.35565
BBC3853	0	6	23	1	n	96.7333	93.7789	n	n	n	20.0375	n	n	0.0611111
BBC3857	0	101	116	33.3333	n	71.7647	82.88	92.2643	n	20.4874	19.9595	19.3889	1.30378	1.62963
BBC3861	0	31	81	17	n	56	65.7176	67.1019	n	20.0765	19.3971	n	1.579	1.78611
BBC3863	4	0	83	19	33.7375	n	49.5719	42.5878	17.2646	n	16.2269	n	0.992667	2.57169
BBC3865	0	0	44	35.6667	n	n	64.937	76.2828	n	n	17.4067	n	0.677333	1.49784
BBC3867	0	31	37	0	n	86.1923	67.6087	n	n	18.6729	16.5331	n	n	1.01667
BBC3869	2	21	28	12.6667	62.53	62.2222	56.28	82.2483	20	20.4849	18.4497	n	0.708	0.620491
BBC3871	2	0	18	10.6667	51.196	n	62.7545	74.2962	17.1867	n	17.5542	n	0.695	0.411473
BBC3875	0	0	111	14.6667	n	n	45.9	54.021	n	n	13.4067	10.5155	1.931	1.54599
BBC3877	3	0	39	33.6667	55.57	n	52.575	60.9029	19.0616	n	18.7556	n	0.806833	0.977778
BBC3879	1	31	26	8.66667	90.15	60.8163	91.8875	82.9256	21.0435	19.0632	16.1524	16.6667	0.92875	2.03448
BBC3881	0	31	130	29	n	80.7143	76.4176	89.5767	n	20.5924	18.0752	n	0.932917	1.64752
BBC3883	n	n	n	n	n	n	n	n	n	n	n	n	n	n
BBC3885	0	25	132	42.3333	n	83.5294	80.235	86.8855	n	19.6398	17.4076	n	0.759	1.25926
BBC3887	1	83	206	13.6667	61.67	78.7253	82.6886	91.9912	17.0213	18.8068	18.8789	n	0.610417	2.11657
BBC3891	n	n	n	n	n	n	n	n	n	n	n	n	n	n
BBC3895	1	0	167	0.333333	95.75	n	100.996	n	19.5616	n	17.6012	n	n	0.775794
BBC3897	1	0	90	26.6667	49.9	n	65.725	66.1511	20.155	n	17.2128	19.4608	0.869	2.11725
BBC3899	5	79	107	4.33333	76.882	75.7494	77.1787	77.4364	20.3613	18.4182	16.8949	n	0.853333	0.910256
BBC3903	3	31	59	6.66667	74.0033	86.5158	88.9577	89.6892	17.807	18.6448	14.8297	n	0.5	0.453322
BBC3905	3	101	74	0.666667	72	81.8141	101.375	n	19.5284	17.656	17.138	n	n	0.148148
BBC3907	27	178	113	11.6667	77.1839	81.9736	95.7816	85.1399	20.4739	18.5	16.8238	n	1.16278	0.548077
BBC3909	0	0	82	4.66667	n	n	88.7593	82.36	n	n	15.8265	n	0.852	0.0123457
BBC3911	n	n	n	n	n	n	n	n	n	n	n	n	n	n
BBC3913	0	0	4	0.333333	n	n	53.2325	n	n	n	19.3462	n	n	0.574074
BBC3917	0	0	47	76.3333	n	n	82.471	65.0736	n	n	20.1629	17.7391	1.59167	1.42548
BBC3919	n	n	n	n	n	n	n	n	n	n	n	n	n	n
BBC3921	20	61	89	20	71	78.1	69.5965	82.5411	19.214	18.7041	19.4974	18.9448	0.717333	1.76232
BBC3923	n	n	n	n	n	n	n	n	n	n	n	n	n	n
BBC3925	0	20	43	19	n	81.7882	107.718	99.0016	n	21.9512	19.4554	n	0.673	0.617385
BBC3927	2	0	79	7	53.79	n	83.2424	70.425	19.887	n	16.3417	n	0.798833	1.13299
BBC3931	0	19	135	44.6667	n	55.7143	54.0523	68.1655	n	22.3404	22.2909	n	1.22833	1.76559
BBC3933	0	0	50	11.6667	n	n	71.7925	80.156	n	n	19.171	n	0.402	0.953413
BBC3935	0	0	85	10.6667	n	n	28.9931	29.6736	n	n	19.8532	n	0.753889	1.3549
BBC5929	0	13	80	21.5	n	73.32	79.5746	71.3117	n	n	18.9101	n	0.8005	2.08422
BBC5931	3	31	121	10	52.7933	74.1	64.6912	77.4542	18.5105	17.8395	16.0273	n	0.861	0.868029
BBC5933	5	0	81	19.3333	32.274	n	44.3433	43.277	19.6621	n	18.6621	n	0.471167	1.3619
BBC5941	14	101	122	24.3333	71.2364	61.8056	72.8882	79.0146	18.8679	19.87	20.2366	n	0.516333	1.13117
BBC5943	0	0	10	6.33333	n	n	68.7222	86.3922	n	n	17.8414	n	0.845167	0.233427
BBC5947	0	11	35	21	n	60.8429	55.603	65.2551	n	n	18.0775	18.8794	1.23217	1.04042
BBC5959	0	0	8	17	n	n	n	37.1804	n	n	17.0912	n	1.3875	0.708333
BBC5961	4	61	131	48	26.2367	45.8667	52.3333	51.5613	19.3902	18.5251	18.7579	n	0.550778	1.03512
BBC5967	0	11	63	18.6667	n	45.7143	53.9562	56.5714	n	20.4604	20.324	n	1.0865	0.514009
BBC5969	1	0	54	68	70.62	n	71.9051	70.0819	17.3913	n	16.9987	n	0.4585	1.84306
BBC5971	0	13	75	13	n	62.5	67.0527	77.2451	n	19.3925	22.0478	19.4869	1.3775	1.61439
BBC5975	0	0	126	4.66667	n	n	83.3562	72.725	n	n	23.2893	n	0.6125	1.37963
BBC5977	3	31	167	104	63.2767	63.4286	80.103	79.8543	19.184	19.227	17.6453	n	0.680667	3.40826
BBC5979	0	0	115	53	n	n	71.4319	62.1315	n	n	16.7207	n	0.656	2.67246
BBC5981	0	0	19	6	n	n	66.8083	68.1354	n	n	16.0959	n	1.39333	1.61293
BBC5983	0	0	177	5.66667	n	n	67.7352	68.3131	n	n	18.7927	n	1.856	0.43208
BBC5987	0	0	29	11.3333	n	n	86.6591	62.6161	n	n	18.9881	17.8253	1.749	0.512986
BBC5991	0	31	97	16	n	63.0769	77.2849	77.6748	n	19.9331	20.1698	n	1.0405	0.448678
BBC5993	0	31	74	19.3333	n	64.8649	70.2143	64.7918	n	19.1964	18.2018	n	1.048	1.78641
BBC5995	0	31	118	9	n	62.6667	57.2016	61.3739	n	19.6577	22.2901	n	0.613	0.257371
BBC5997	3	34	67	32	109.92	113.494	109.339	115.537	19.3651	19.5325	15.8415	n	0.60025	1.73629
BBC6001	0	0	43	42.3333	n	n	90.77	83.3308	n	n	19.7788	20.1659	0.813333	1.4109
BBC6005	0	29	26	0.333333	n	61	95.5833	n	n	17.6283	16.1561	n	n	0.0544872
BBC6009	0	0	32	3.66667	n	n	82.1192	73.3718	n	n	17.738	n	0.821333	0.0638645
BBC6013	0	61	98	34.6667	n	74.2373	73.2406	75.8838	n	17.9665	17.5354	n	0.721333	1.78594
BBC6015	0	10	68	37.3333	n	42.4375	39.541	49.5473	n	n	15.9159	n	1.331	1.05076
BBC6019	0	0	99	19.6667	n	n	44.675	42.6771	n	n	19.3407	19.0047	0.989	0.918803
BBC6021	1	40	89	30.3333	32.99	80.915	106.026	95.1	16.9863	20.1918	20.5626	n	1.554	1.31818
BBC6023	n	n	n	n	n	n	n	n	n	n	n	n	n	n
BBC6025	1	0	113	45.6667	56.83	n	76.5424	74.21	20.3085	n	19.856	n	0.742	2.2875
BBC6027	3	0	153	24.6667	100	n	60.176	50.1358	18.4953	n	19.3489	n	0.9035	1.20238
BBC6030	0	0	65	0.666667	n	n	64.0769	n	n	n	17.5375	n	n	0.037037
BBC6033	0	0	129	4.66667	n	n	67.2661	63.2	n	n	18.4214	n	0.665	1.19527
BBC6035	0	0	23	2.66667	n	n	60.3333	n	n	n	18.0625	n	n	1.11667
BBC6037	1	0	102	33	29.53	n	51.0192	58.2922	18.0685	n	17.7307	n	0.84425	1.44463
BBC6041	1	7	135	23.3333	85.8	124.914	111.172	105.693	16.7619	n	16.7473	n	1.423	0.943939
BBC6043	n	n	n	n	n	n	n	n	n	n	n	n	n	n
BBC6045	1	24	113	29.3333	51.47	69	83.8446	80.1109	16.8798	19.4017	20.1947	19.2043	1.282	0.915627
BBC6047	0	0	0	0	n	n	n	n	n	n	n	n	n	0.961601
BBC6049	n	n	n	n	n	n	n	n	n	n	n	n	n	n
BBC6055	n	n	n	n	n	n	n	n	n	n	n	n	n	n
BBC6057	n	n	n	n	n	n	n	n	n	n	n	n	n	n
BBC6059	n	n	n	n	n	n	n	n	n	n	n	n	n	n
BBC6061	0	0	53	39.3333	n	n	74.5647	67.0068	n	n	21.514	n	1.08667	3.29865
BBC6063	2	0	209	16.3333	37.68	n	66.849	66.3869	19.2714	n	18.3386	n	0.881	0.84086
BBC6101	0	0	35	11.3333	n	n	59.6192	54.2967	n	n	20.4478	n	0.7985	0.824155
BBC6111	0	0	61	18.3333	n	n	72.1947	69.1673	n	n	18.6614	n	1.015	1.06878
BBC6123	0	0	91	0.666667	n	n	91.4138	n	n	n	18.5042	n	n	0.0430108
BBC6125	0	0	32	7.33333	n	n	82.9692	68.6347	n	n	18.9752	17.6672	1.548	0.27866

## Sheet: Metadata
Trait_Heading	Description
Individuals_in_Map_Order	Individuals in the map order
Fno_Season_1	Fruit number collected for season 1
Fno_Season_2	Fruit number collected for season 2
Fno_Season_3	Fruit number collected for season 3
Fno_Season_4	Fruit number collected for season 4
Fwt_Season_1	Fruit weight (g) collected for season 1
Fwt_Season_2	Fruit weight (g) collected for season 2
Fwt_Season_3	Fruit weight (g) collected for season 3
Fwt_Season_4	Fruit weight (g) collected for season 4
DryMatter_Season_1	Dry Matter Content (%) collected in season 1
DryMatter_Season_2	Dry Matter Content (%) collected in season 2
DryMatter_Season_3	Dry Matter Content (%) collected in season 3
DryMatter_Season_4	Dry Matter Content (%) collected in season 4
Str_Season_4	Fruit firmness (kgf), after 12 weeks post harvest, collected in season 4
KingFlr_Season_4	King flowers per winter bud collected in season 4
